# Supplementary figures and images for: Comparative profiling of white matter development in the human and mouse brain reveals volumetric deficits and delayed myelination in Angelman syndrome
Source: PubMed Central journal article supplement — Mol Autism. 2024 Dec 26;15:54. doi: 10.1186/s13229-024-00636-y (PMC11670556; doi:10.1186/s13229-024-00636-y), 2024-12-26

**A**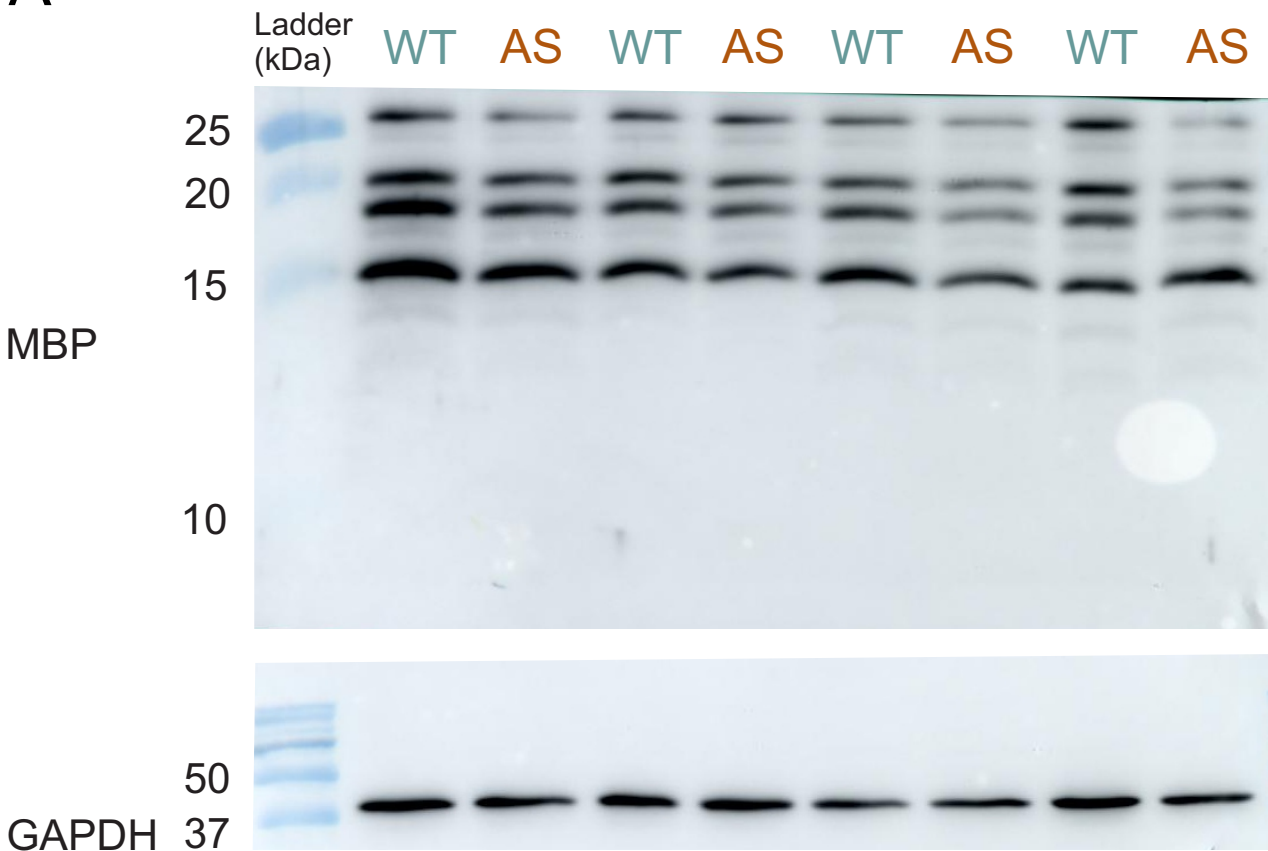



**E**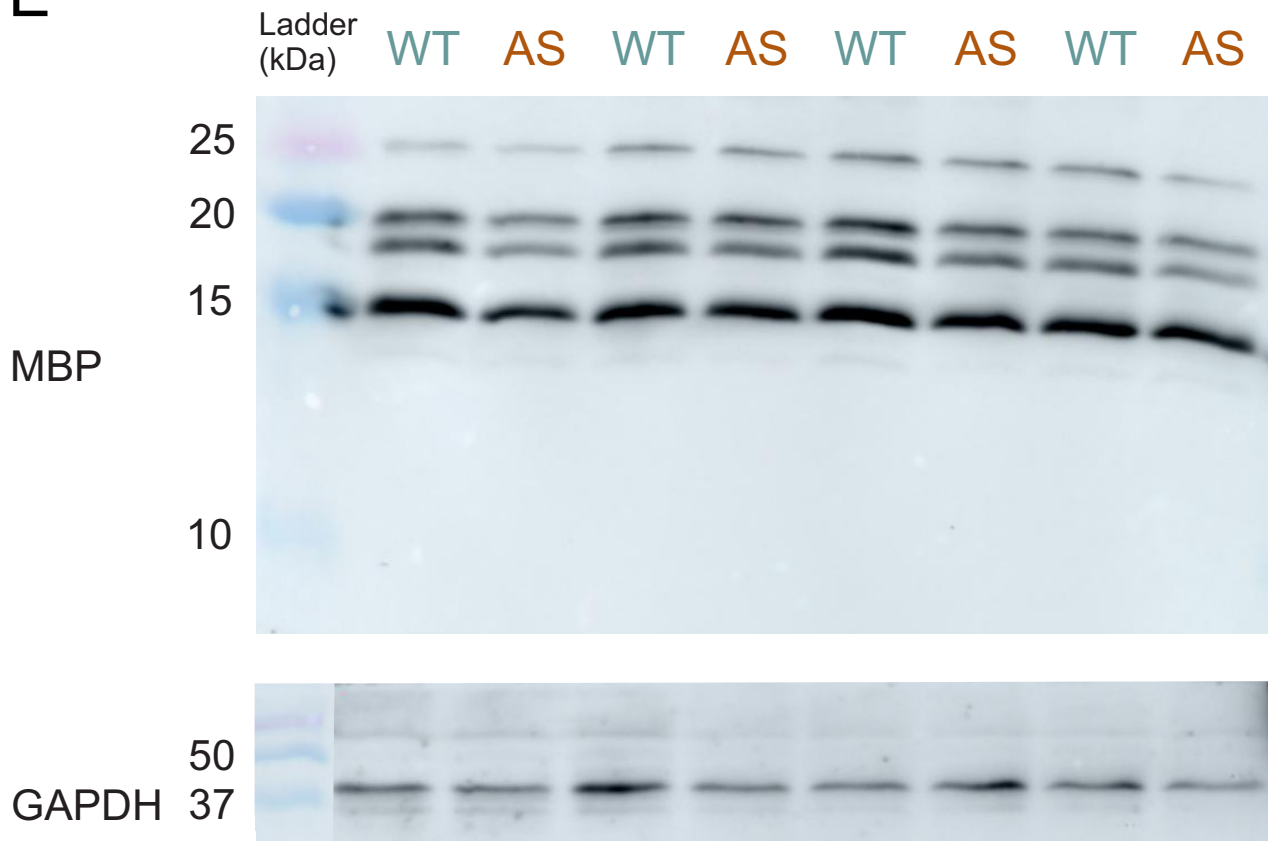

Supplement: 13229_2024_636_MOESM1_ESM.pdf [file 13229_2024_636_MOESM1_ESM.pdf]
